# Supplementary material
Source: PubMed Central journal article supplement (PMC4009400)
Supplement: NIHMS574602-supplement-01.pdf [file NIHMS574602-supplement-01.pdf]

## Web-Supplements

**Figure S1: Percentage of Option B+ pregnant women with no follow-up visit – random effects meta-analysis**

Forest plot for the percentage of pregnant Option B+ patients who missed their first follow-up visit and failed to return to the clinics for more than 60 days (no follow-up after ART initiation).

\*Study facilities are sorted by the proportion of Option B+ pregnant women per facility

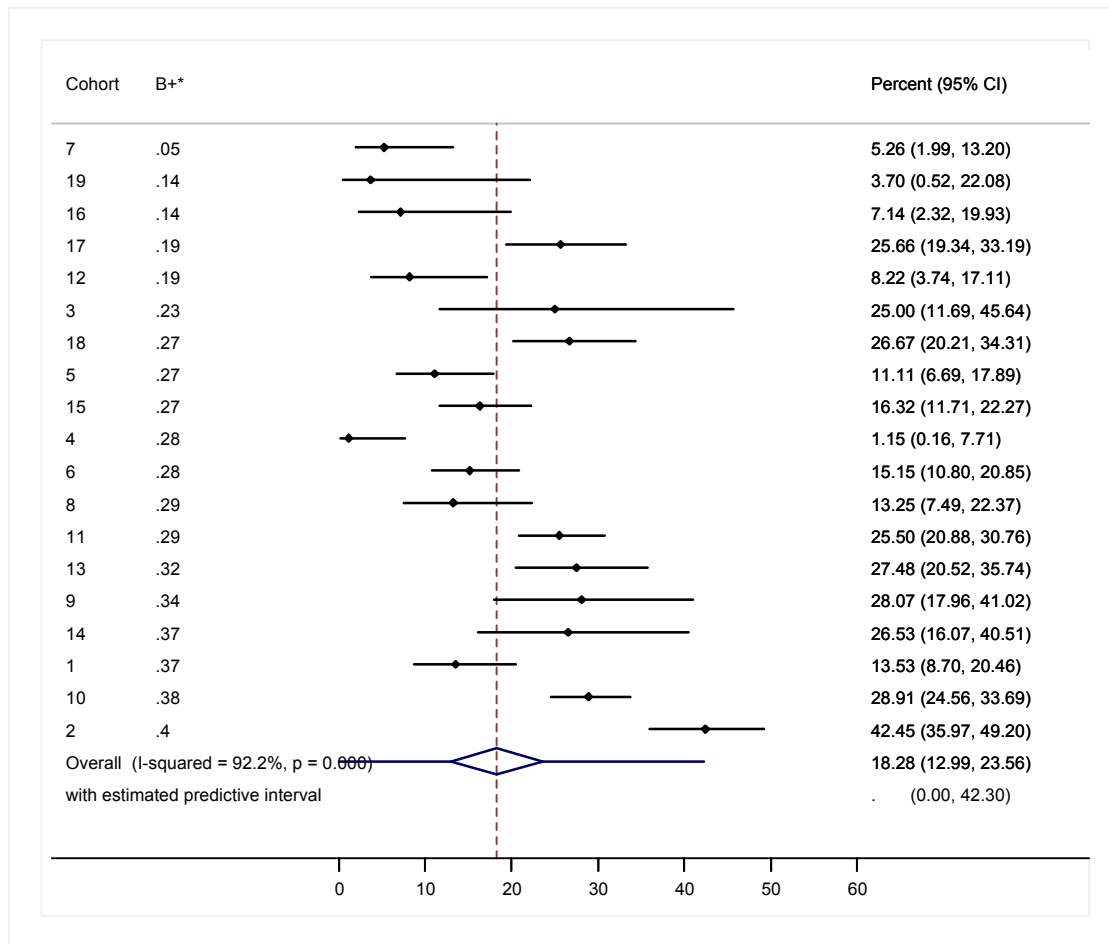

**Table S1: Predictors of the between-cohort variance for the odds of pregnant Option B+ women getting lost to programme immediately after starting antiretroviral therapy (ART).**

|                                                                 | OR (95% CI)        | p-value | Tau squared (in %) <sup>1</sup> |
|-----------------------------------------------------------------|--------------------|---------|---------------------------------|
| <b>A Univariable analysis</b>                                   |                    |         |                                 |
| Proportion of B+ pregnant women <sup>2</sup> (per 10% increase) | 1.83 (1.14-2.93)   | 0.014   | 81.0                            |
| Additional adherence counselling <sup>3</sup> (yes/no)          | 0.45 (0.20- 0.98)  | 0.045   | 77.9                            |
| <b>Facility type</b>                                            |                    | 0.156   | 80.7                            |
| Health Centre                                                   | Reference          |         |                                 |
| Mission Hospital                                                | 0.53 (0.10- 2.82)  |         |                                 |
| District Hospital                                               | 2.13 (0.65- 7.00)  |         |                                 |
| Central Hospital                                                | 1.50 (0.27- 8.44)  |         |                                 |
| Urbanity (rural/urban)                                          | 0.53 (0.20- 1.40)  | 0.187   | 83.7                            |
| <b>B Multivariable analysis (Model A)</b>                       |                    | 0.0432  | 74.1                            |
| Proportion of B+ pregnant women <sup>2</sup> (per 10% increase) | 1.53 (0.87- 2.68)  | 0.126   |                                 |
| Additional adherence counseling <sup>3</sup> (yes/no)           | 0.63 (0.28- 1.45)  | 0.255   |                                 |
| <b>C Multivariable analysis (Model B)</b>                       |                    | 0.028   | 57.7                            |
| Proportion of B+ pregnant women <sup>2</sup> (per 10% increase) | 1.56 (0.85- 2.85)  | 0.132   |                                 |
| Additional adherence counseling <sup>3</sup> (yes/no)           | 0.71 (0.38- 1.33)  | 0.254   |                                 |
| <b>Facility type</b>                                            |                    |         |                                 |
| Health Centre                                                   | Reference          | 0.0859  |                                 |
| Mission Hospital                                                | 0.84 (0.18- 4.00)  |         |                                 |
| District Hospital                                               | 1.69 (0.62- 4.57)  |         |                                 |
| Central Hospital                                                | 3.94 (1.02- 15.26) |         |                                 |

Multivariable analysis adjusted for all variables shown in model; CI confidence intervals

<sup>1</sup> between site variance

<sup>2</sup> Proportion of pregnant women who started with an Option B+ indication at facility among

<sup>3</sup> Some facilities offered additional counseling that is not part of the national guidelines using mentor mothers and expert patients. These counselors are experienced ART patients who share their experience on ART and motivate the women on the need and strategies for adherence
